# Supplementary material
Source: Springer Nature journal article supplement (http://www.springermedizin.de/resource/supplementary/12874_2012_763_MOESM1_ESM.pdf/9432878)
Supplement: MOESM1 [file 9432878]

## OBSERVATIONAL STUDIES

### Step 1

Calculate  $m_X$ ,  $s_X$  and  $m_Y$ ,  $s_Y$  from reported univariate statistic using equations (1)-(7)

### Step 2

Calculate  $m_{X_0}$ ,  $s_{X_0}$  and  $m_{Y_0}$ ,  $s_{Y_0}$  from  $m_X$ ,  $s_X$  and  $m_Y$ ,  $s_Y$ : equations (8), (9)

### Step 3

Calculate  $r_{XY}$  from reported bivariate statistic using equations (10)-(17)

### Step 4

Calculate  $b_{YX}$  from  $r_{XY}$ : equation (18)  
Calculate  $se(b_{YX})$ : equation (19)

## RANDOMIZED CONTROLLED TRIALS

### Step 1

Calculate  $m_Y$  and  $s_Y$  from reported values after intervention for placebo and intervention group using equations (1)-(7)

### Step 2

Calculate  $m_X$  as  $\ln(m_{X_0})$  for both placebo and intervention group

### Step 3

Calculate  $b_{YX}$ : equation (20)  
Calculate  $se(b_{YX})$ : equation (21)
